# Supplementary material for: Use of Wheat Straw for Value-Added Product Xylanase by Penicillium chrysogenum Strain A3 DSM105774
Source: MDPI journal article supplement (doi:10.3390/jof7090696), 2021-08-27
Supplement: s1 [file s1]

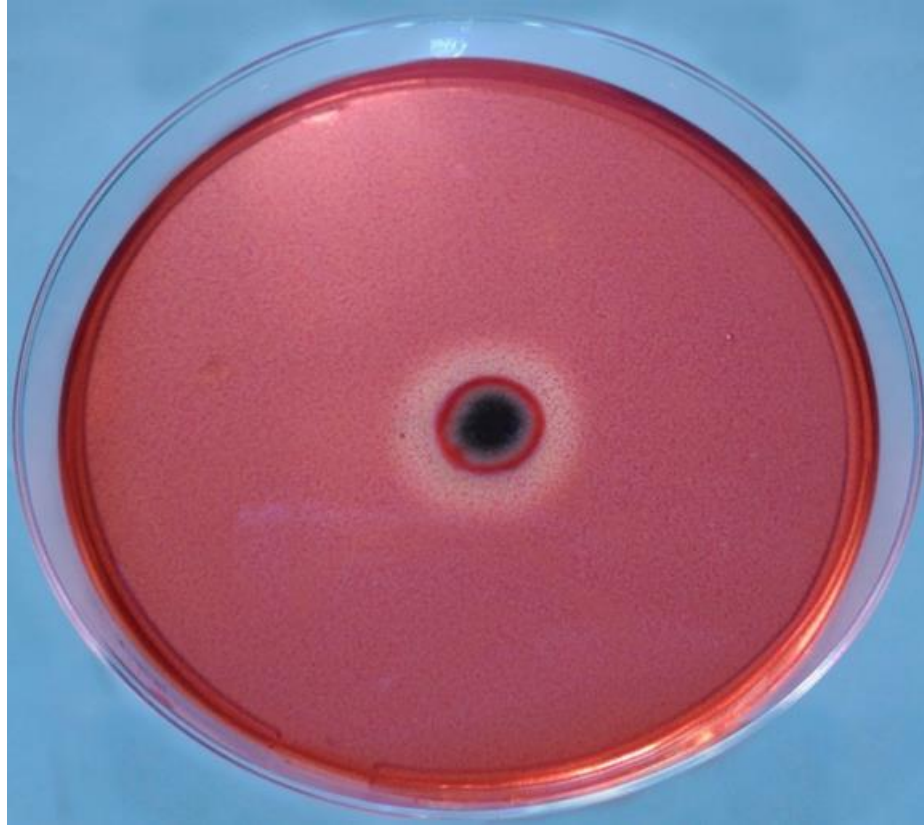

Figure S1. Representative screening of xylanase-producing fungi on beechwood xylan-containing agar plate showing a clear hydrolytic zone around the fungal colony against red background after flooding the plate with 0.1%(w/v) Congo red.
